# Supplementary material for: Transition Mutations in the hTERT Promoter Are Unrelated to Potential i-motif Formation in the C-Rich Strand
Source: MDPI journal article supplement (doi:10.3390/biom13091308), 2023-08-25

Article

# Transition Mutations in the hTERT Promoter Are Unrelated to Potential i-motif Formation in the C-Rich Strand

James W. Conrad <sup>1,†</sup>, Mark L. Sowers <sup>1,2,†</sup>, Dianne Y. Yap <sup>1</sup>, Ellie Cherryhomes <sup>1</sup>, B. Montgomery Pettitt <sup>1,3</sup>, Kamil Khanipov <sup>1</sup> and Lawrence C. Sowers <sup>1,4,\*</sup>

<sup>1</sup> Department of Pharmacology and Toxicology, The University of Texas Medical Branch, Galveston, TX 77555, USA; jamconra@utmb.edu (J.W.C.); mlsowers@utmb.edu (M.L.S.); dyyap@utmb.edu (D.Y.Y.); eccherry@utmb.edu (E.C.); mpettitt@utmb.edu (B.M.P.); kakhanip@utmb.edu (K.K.)

<sup>2</sup> MD-PhD Combined Degree Program, The University of Texas Medical Branch, Galveston, TX 77555, USA

<sup>3</sup> Department of Biochemistry and Molecular Biology, The University of Texas Medical Branch, Galveston, TX 77555, USA

<sup>4</sup> Department of Internal Medicine, The University of Texas Medical Branch, Galveston, TX 77555, USA

\* Correspondence: lasowers@utmb.edu

† These authors contributed equally to this work.

| Table of Contents                                                    | Pg   |
|----------------------------------------------------------------------|------|
| Table S1. Oligonucleotides used in this study                        | 2    |
| Table S2. Rate constants for single-stranded and double-stranded DNA | 3    |
| Figure S1. pH titration of partial length hTERT sequences            | 4    |
| Figure S2. CD spectra of partial length hTERT sequences              | 5    |
| Table S3. Synthesis of hTERT oligonucleotides                        | 6    |
| Table S4. Dunn's multiple comparisons test                           | 7    |
| Table S5. Maldi-MS of hTERT oligonucleotides                         | 8    |
| Associated Maldi-MS spectra                                          | 9-13 |

Table S1. Oligonucleotides used in this study.

| Name             | Purpose           | Sequence (5'-3')                                                                                                                  |
|------------------|-------------------|-----------------------------------------------------------------------------------------------------------------------------------|
| 1 (I)            | hTERT-21mer-3'T   | CCCCGCCCCGTCCCGACCCCT                                                                                                             |
| 2 (II)           | hTERT-21mer-3'G   | GCCCCGTCCCGACCCCTCCCG                                                                                                             |
| 3 (III)          | hTERT-23mer-3'G   | TCCCGACCCCTCCCGGGTCCCCG                                                                                                           |
| 4 (IV)           | hTERT-23mer-3'A   | ACCCCTCCCGGGTCCCCGGCCCA                                                                                                           |
| 5 (V)            | hTERT-25mer-3'T   | TCCCGGGTCCCGGGCCAGCCCCCT                                                                                                          |
| 6 (VI)           | hTERT-27mer-3'T   | TCCCCGGCCCAGCCCCCTCCGGGGCCCT                                                                                                      |
| 7 (VII)          | hTERT-25mer-3'A   | GCCCAGCCCCCTCCGGGGCCCTCCCA                                                                                                        |
| 8 (VIII)         | hTERT-26mer-3'T   | GCCCCCTCCGGGGCCCTCCCAGCCCT                                                                                                        |
| 9 (IX)           | hTERT-19mer-3'C   | GCCCTCCCAGCCCCTCCCC                                                                                                               |
| Seq-hTERT-C-rich | Sequencing oligo  | ATGTGTAACAG-TTCCTGCCATACTGGTCCCCGCCCCGTCCCGACCCCTCCCGGGTCCCCGGC<br>CCAGCCCCCTCCGGGGCCCTCCCAGCCCTCCCCGACGTCCACCTGGAA-GACTCCAGGTCAG |
| Seq-hTERT-G-rich | Sequencing oligo  | CTGACCTGGAGTCTTCCAGGTGGACGTCGGGGAGGGGCTGG-GAGGGCCCGGAGGGGGCTGGGCCGGGGACCCGGGAGGGGTCGGGAC-GGGGCGGGGACCAGTATGGCAGGAAGTGTACACAT      |
| Primer -F5       | Step 1 PCR primer | TCGTCGGCAGCGTCAGATGTGTATAAGAGACAGCAACTACATGTG-TAACAGTTCCTGC                                                                       |
| Primer -R2       | Step 1 PCR primer | GTCTCGTGGGCTCGGAGATGTGTATAAGAGACAGCTCCTGACCTGGAG-TCTTCCAG                                                                         |
| Index Primer -F  | Step 2 index PCR  | AATGATACGGCGACCACCGAGATCTACACXXXXXXXXTCGTCGG-CAGCGTC                                                                              |
| Index Primer -R  | Step 2 index PCR  | CAAGCAGAAGACGGCATACGAGATXXXXXXXXGTCTCGTGGGCTCGG                                                                                   |

Table S2. Rate constants for single-stranded and double-stranded DNA incubated at 37°C for 11 days at three different pH. The average rate constants across all 46 cytosines is given and the rate constants for the mutational hotspots C250 and C228.

| pH                      | AVG k<br>( $\times 10^{-4}$ ) | SD<br>( $\times 10^{-4}$ ) | % DEV | C250<br>Cytosine<br>22 | C228<br>Cytosine<br>44 | Reads (#) |
|-------------------------|-------------------------------|----------------------------|-------|------------------------|------------------------|-----------|
| ssDNA at 37 °C for 11 d |                               |                            |       |                        |                        |           |
| 7                       | 4.94                          | 2.13                       | 43.3  | 6.83                   | 4.12                   | 185,169   |
| 6                       | 3.65                          | 1.57                       | 42.6  | 3.70                   | 4.99                   | 225,497   |
| 5                       | 8.31                          | 3.38                       | 40.6  | 11.5                   | 8.22                   | 170,283   |
| dsDNA at 37 °C for 11 d |                               |                            |       |                        |                        |           |
| 7                       | 3.81                          | 2.62                       | 68.7  | 6.90                   | 5.60                   | 118,533   |
| 6                       | 3.83                          | 2.50                       | 65.0  | 8.02                   | 2.37                   | 139,337   |
| 5                       | 6.74                          | 2.24                       | 33.0  | 9.81                   | 6.36                   | 142,896   |

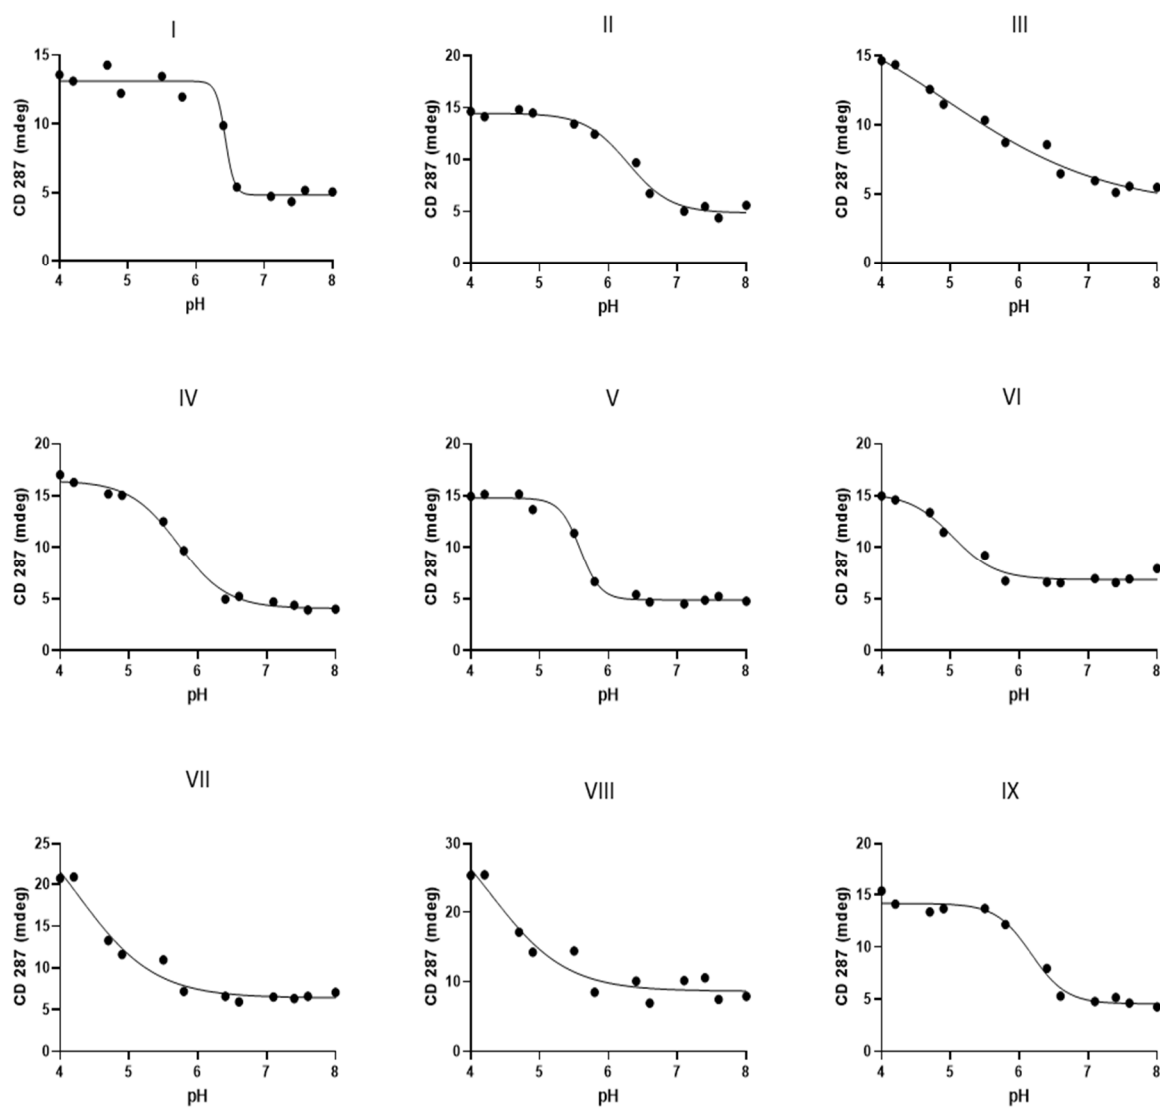

Figure S1. pH titration of partial length hTERT sequences to determine the i-motif pKa.

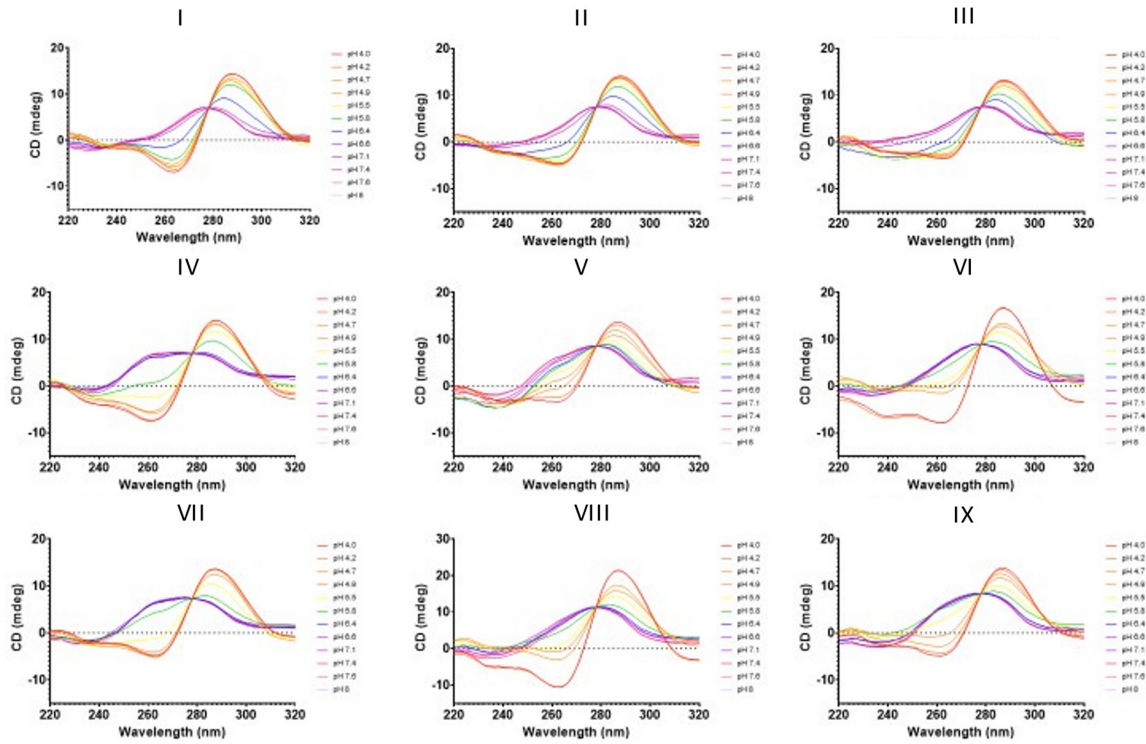

Figure S2. CD spectra of partial length hTERT sequences at pH 4-8.

Table S3. Synthesis of hTERT oligonucleotides

|   | Oligonucleotide | Sequence                        | Synthesis Conditions |
|---|-----------------|---------------------------------|----------------------|
| 1 | hTERT-21mer-3'T | 5'-CCCCGCCCCGTCCCGACCCCT-3'     | Standard B           |
| 2 | hTERT-21mer-3'G | 5'-GCCCCGTCCCGACCCCTCCCG-3'     | Standard B           |
| 3 | hTERT-23mer-3'G | 5'-TCCCGACCCCTCCCGGGTCCCG-3'    | Standard A           |
| 4 | hTERT-23mer-3'A | 5'-ACCCCTCCCGGGTCCCGGCCCA-3'    | Standard A           |
| 5 | hTERT-25mer-3'T | 5'-TCCCGGGTCCCGGCCCAAGCCCT-3'   | Standard B           |
| 6 | hTERT-27mer-3'T | 5'-TCCCGGCCCAAGCCCTCCGGGCCCT-3' | Standard B           |
| 7 | hTERT-25mer-3'A | 5'-GCCCAGCCCTCCGGGCCCTCCCA-3'   | Standard A           |
| 8 | hTERT-26mer-3'T | 5'-GCCCCCTCCGGGCCCTCCAGCCCT-3'  | Standard A           |
| 9 | hTERT-19mer-3'C | 5'-GCCCTCCAGCCCTCCCC-3'         | Standard A           |

All oligonucleotides were synthesized on an Expedite 8909 DNA synthesizer.

**Standard A:** Oligonucleotides were synthesized using standard phosphoramidites (Bz-dA, Bz-dC, iBu-dG, dT) and deprotected in ammonium hydroxide at 55°C for 16 hours.

**Standard B:** Oligonucleotides were synthesized using standard phosphoramidites (Bz-dA, Bz-dC, iBu-dG, dT) and deprotected in ammonium hydroxide at room temperature for 65 hours.

**Purification and detritylation by C18 Sep-pak:** C18 Sep-pak cartridge (Waters WAT020515) was prepared by washing with acetonitrile (5 mL) and 1 M triethylammonium acetate (10 mL). The crude DMT-on oligonucleotide was loaded onto the cartridge in 1 M triethylammonium acetate (2 mL) then failure sequences were eluted with 10% ammonium hydroxide (5 mL) and water (5 mL). Detritylation was done with 2% trifluoroacetic acid (5 mL) and the cartridge washed with water (5 mL). The DMT-off oligonucleotide was then eluted with acetonitrile in water (2 mL of 20% ACN, 4 mL of 50% ACN).

Table S4. Dunn's multiple comparisons test of C&gt;T transition rates between treatments.

| Dunn's multiple comparisons test      | Adjusted P Value |
|---------------------------------------|------------------|
| ssDNA pH 7 95°C vs. ssDNA pH 5 37 °C  | <0.0001          |
| ssDNA pH 7 95°C vs. ssDNA pH 6 37 °C  | <0.0001          |
| ssDNA pH 7 95°C vs. ssDNA pH 7 37 °C  | <0.0001          |
| ssDNA pH 7 95°C vs. dsDNA pH 5 37 °C  | <0.0001          |
| ssDNA pH 7 95°C vs. dsDNA pH 6 37 °C  | <0.0001          |
| ssDNA pH 7 95°C vs. dsDNA pH 7 37 °C  | <0.0001          |
| ssDNA pH 5 37 °C vs. ssDNA pH 6 37 °C | <0.0001          |
| ssDNA pH 5 37 °C vs. ssDNA pH 7 37 °C | 0.0036           |
| ssDNA pH 5 37 °C vs. dsDNA pH 5 37 °C | >0.9999          |
| ssDNA pH 5 37 °C vs. dsDNA pH 6 37 °C | <0.0001          |
| ssDNA pH 5 37 °C vs. dsDNA pH 7 37 °C | <0.0001          |
| ssDNA pH 6 37 °C vs. ssDNA pH 7 37 °C | 0.8593           |
| ssDNA pH 6 37 °C vs. dsDNA pH 5 37 °C | <0.0001          |
| ssDNA pH 6 37 °C vs. dsDNA pH 6 37 °C | >0.9999          |
| ssDNA pH 6 37 °C vs. dsDNA pH 7 37 °C | >0.9999          |
| ssDNA pH 7 37 °C vs. dsDNA pH 5 37 °C | 0.1793           |
| ssDNA pH 7 37 °C vs. dsDNA pH 6 37 °C | >0.9999          |
| ssDNA pH 7 37 °C vs. dsDNA pH 7 37 °C | >0.9999          |
| dsDNA pH 5 37 °C vs. dsDNA pH 6 37 °C | 0.0001           |
| dsDNA pH 5 37 °C vs. dsDNA pH 7 37 °C | 0.0004           |
| dsDNA pH 6 37 °C vs. dsDNA pH 7 37 °C | >0.9999          |

Table S5. Maldi-MS of hTERT oligonucleotides

| Oligonucleotide | Expected (M+H) | Observed (M+H) | $\Delta$ |
|-----------------|----------------|----------------|----------|
| hTERT-21mer-3'T | 6185.81        | 6184.54        | -1.27    |
| hTERT-21mer-3'G | 6225.83        | 6223.03        | -2.8     |
| hTERT-23mer-3'G | 6859.21        | 6857.06        | -2.15    |
| hTERT-23mer-3'A | 6868.22        | 6863.15        | -5.07    |
| hTERT-25mer-3'T | 7477.58        | 7476.58        | -1       |
| hTERT-27mer-3'T | 8055.93        | 8053.6         | -2.33    |
| hTERT-25mer-3'A | 7446.57        | 7443.07        | -3.5     |
| hTERT-26mer-3'T | 7726.73        | 7720.83        | -5.9     |
| hTERT-19mer-3'C | 5567.43        | 5564.07        | -3.36    |

**Desalting of C18 Sep-pak purified oligonucleotides:** Micro BioSpin P6 column (BioRad 732-6221) was prepared by centrifugation at 1000G for 2 minutes. Water (500  $\mu$ L) was added and the column washed by centrifugation at 1000G for 1 minute then a second wash was done. 1 OD of purified oligonucleotide in water (100  $\mu$ L) was loaded and eluted into a new collection tube by centrifugation at 1000G for 4 minutes. The water was evaporated under reduced pressure and the oligo resuspended in water (25  $\mu$ L).

**Maldi Sample Preparation:** 0.4 OD of HPLC purified or P6 BioSpin column desalted oligo in water (10  $\mu$ L) was mixed with desalting ion exchange resin (2  $\mu$ L) for 1 hour.

**Desalting Ion Exchange Resin:** Prepare slurry of cation exchange resin (6 g) in 50 / 50 acetonitrile / water (5 mL), pour into column and let settle (gravity). Wash resin with 50 / 50 acetonitrile / water (3-4 column volumes), 5% ammonium hydroxide (2 x 10 mL), 2 M ammonium acetate (3 x 10 mL) and water (3-4 column volumes). Aliquot into 1 mL fractions (50% suspension) and store -20°C.

**Matrix:** 3-hydroxypicolinic acid (70 mg) and ammonium citrate (10 mg) in 50/50 acetonitrile / water (1 mL) with 0.1% trifluoroacetic acid

The Maldi plate was spotted with HPA matrix (1  $\mu$ L) and allowed to dry. The sample (1  $\mu$ L) was spotted on top of the matrix and allowed to dry before running on Bruker Autoflex Maldi-MS in positive mode.

Expected (M+H) values were calculated using average molecular weights.



# **MALDI-MS<sup>+</sup> spectra of oligonucleotides**

hTERT-21mer-3'T

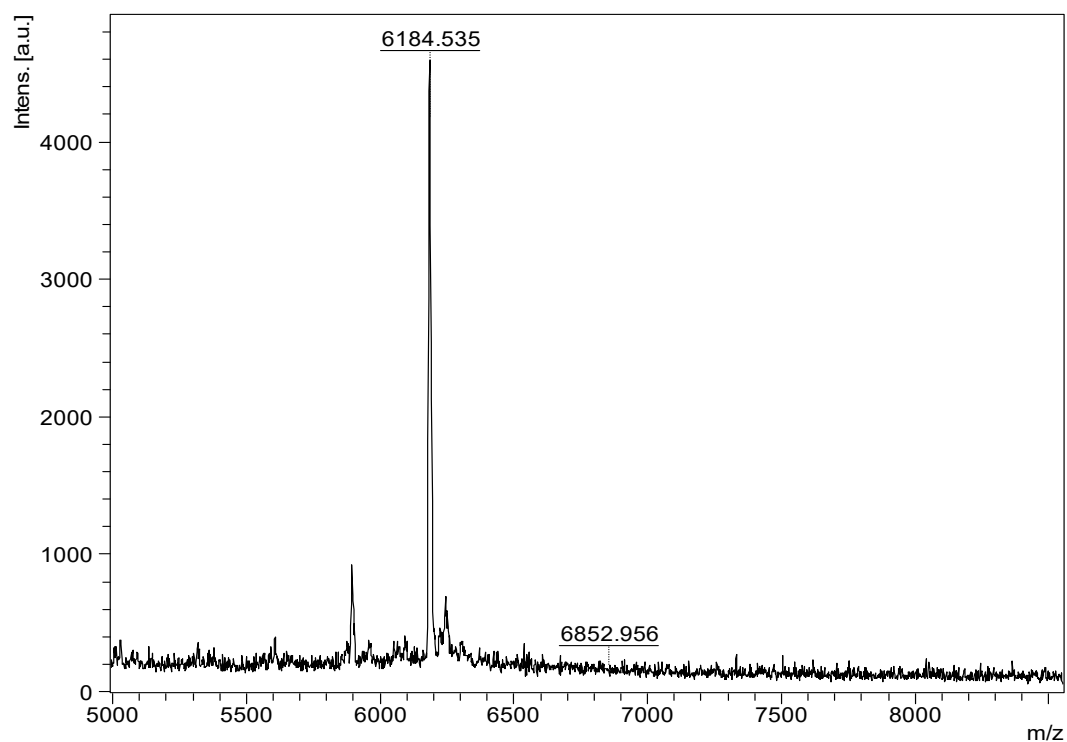

hTERT-21mer-3'G

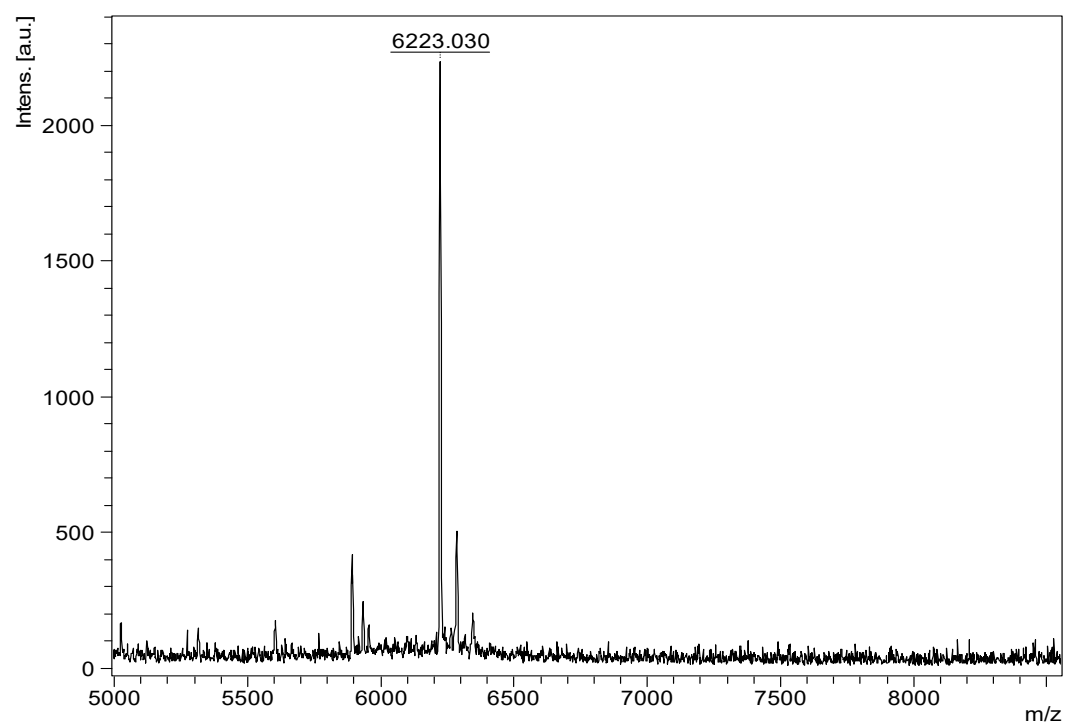

hTERT-23mer-3'G

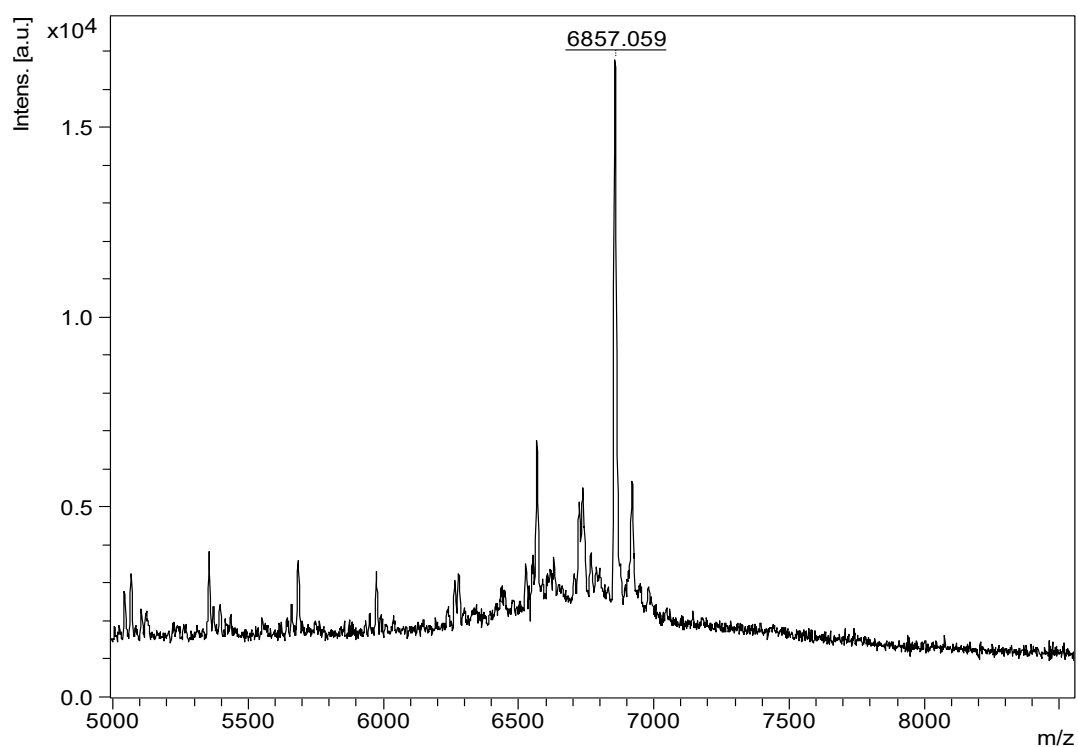

hTERT-23mer-3'A

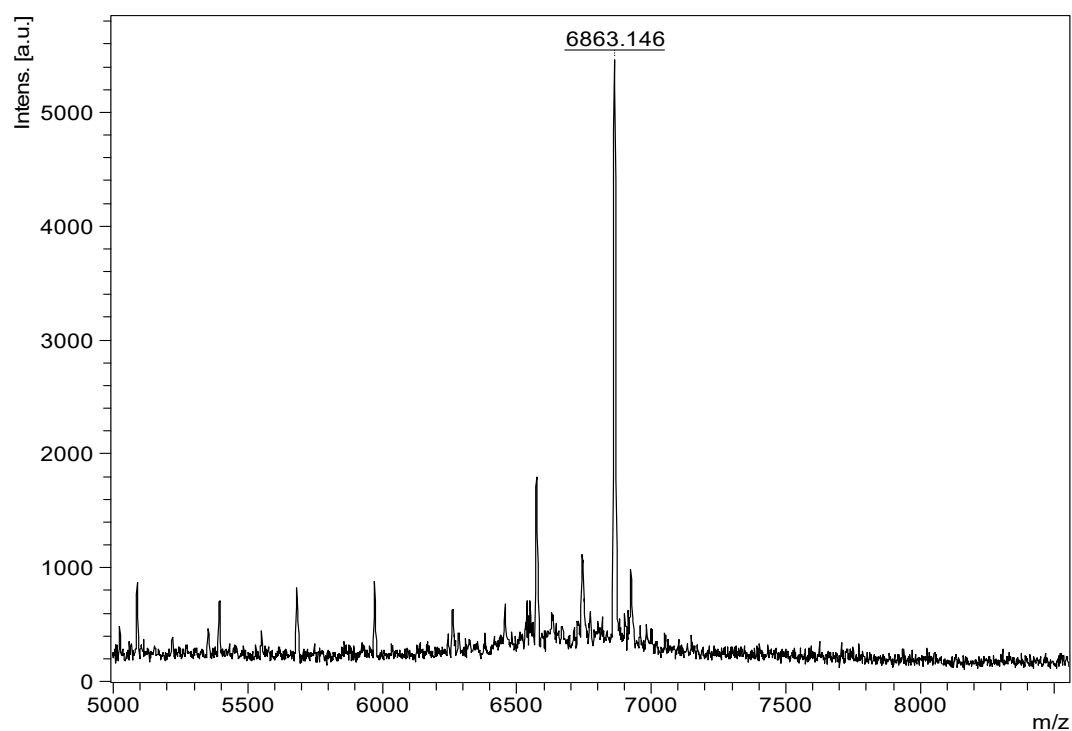

hTERT-25mer-3'T

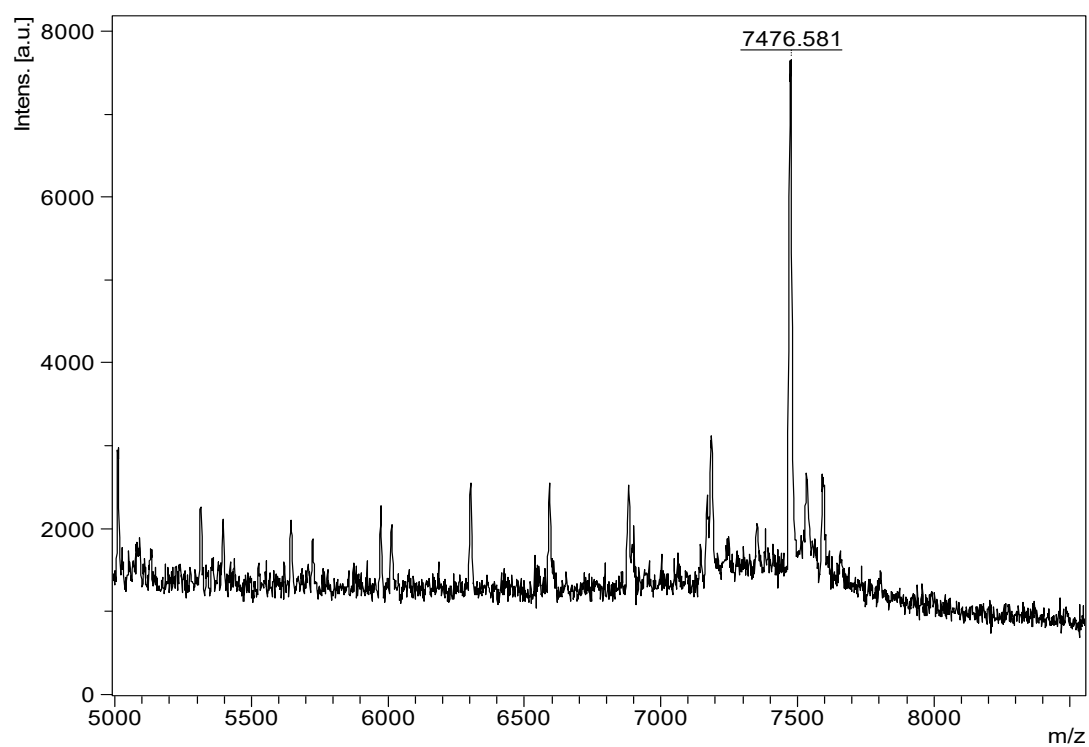

hTERT-27mer-3'T

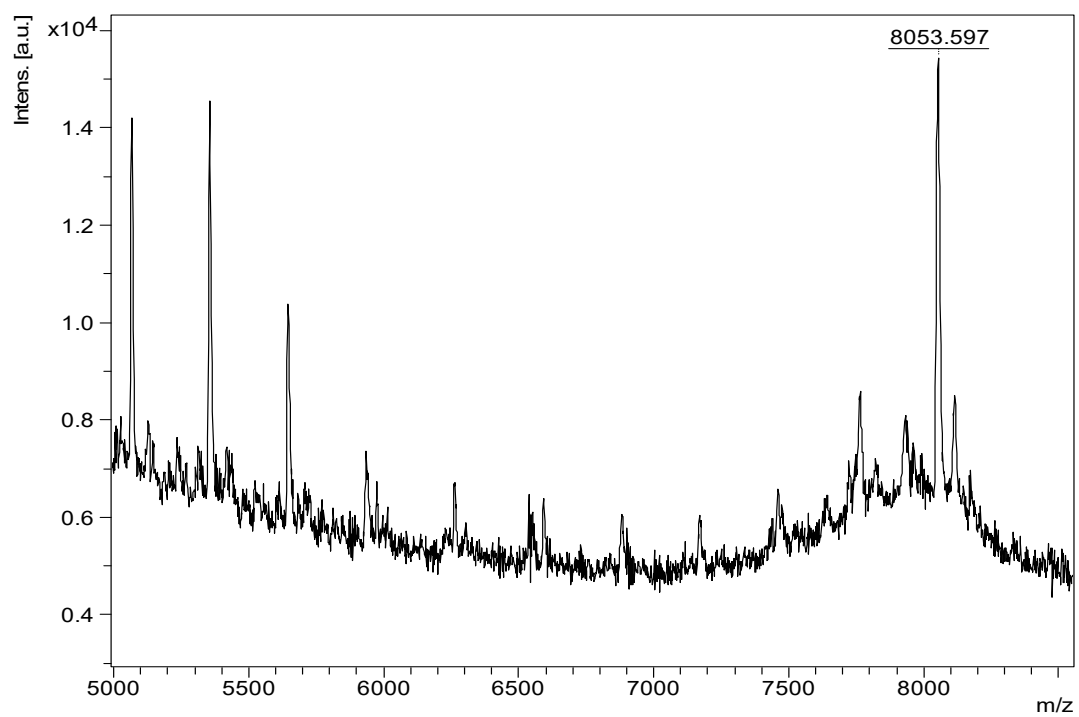

hTERT-25mer-3'A

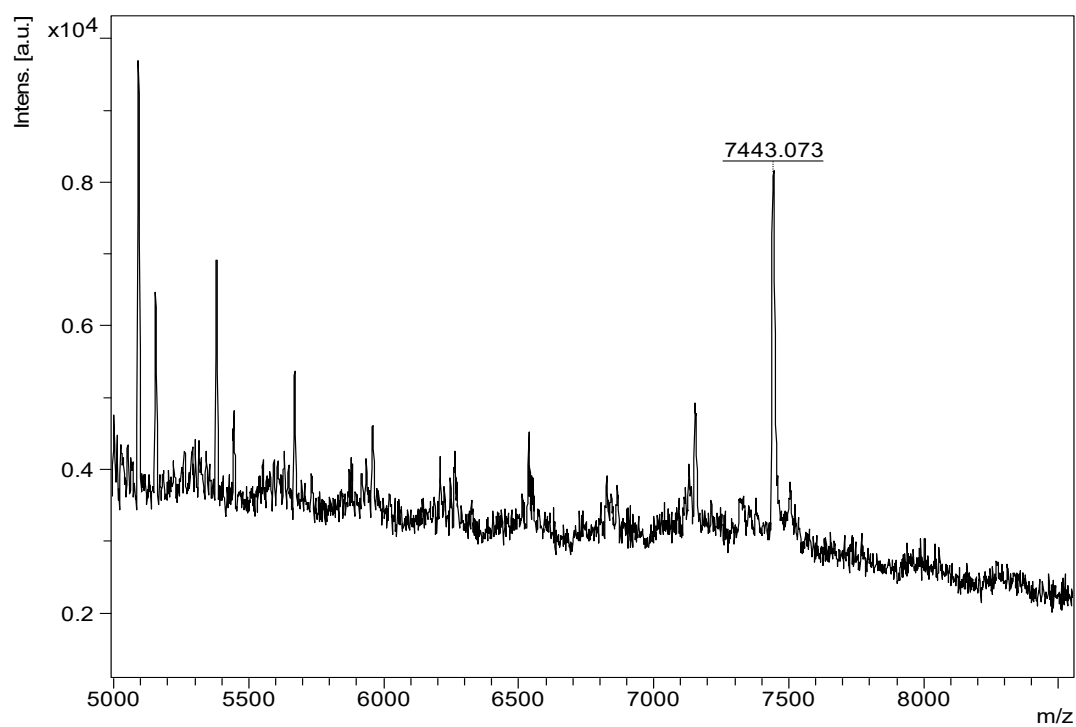

hTERT-26mer-3'T

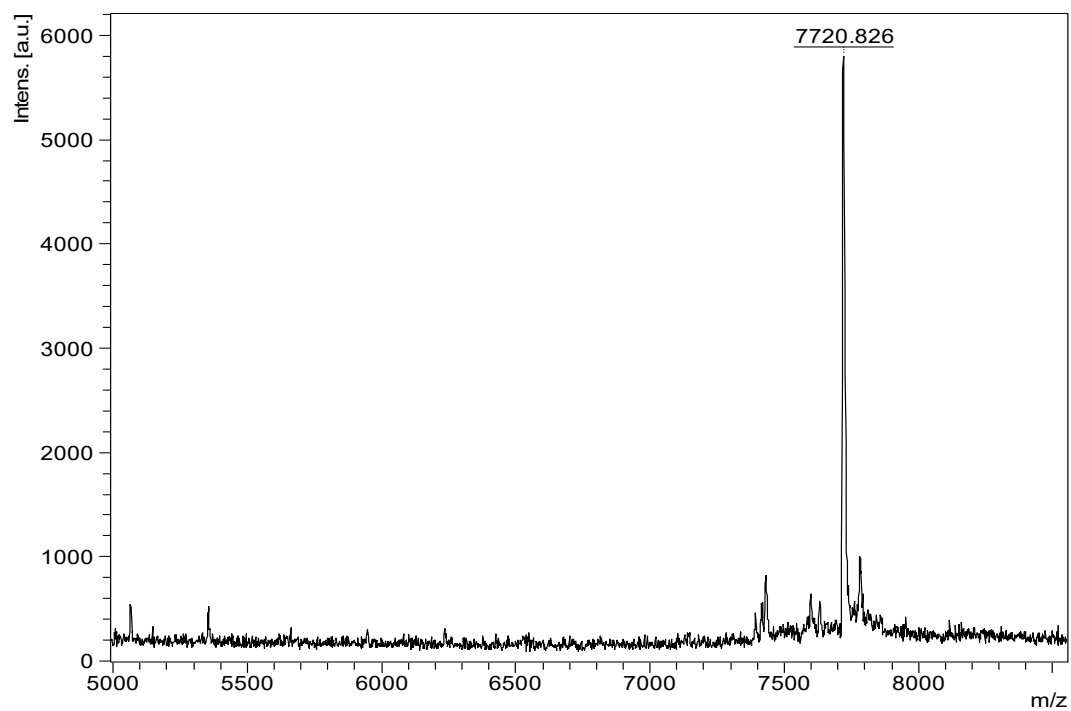

hTERT-19mer-3'C

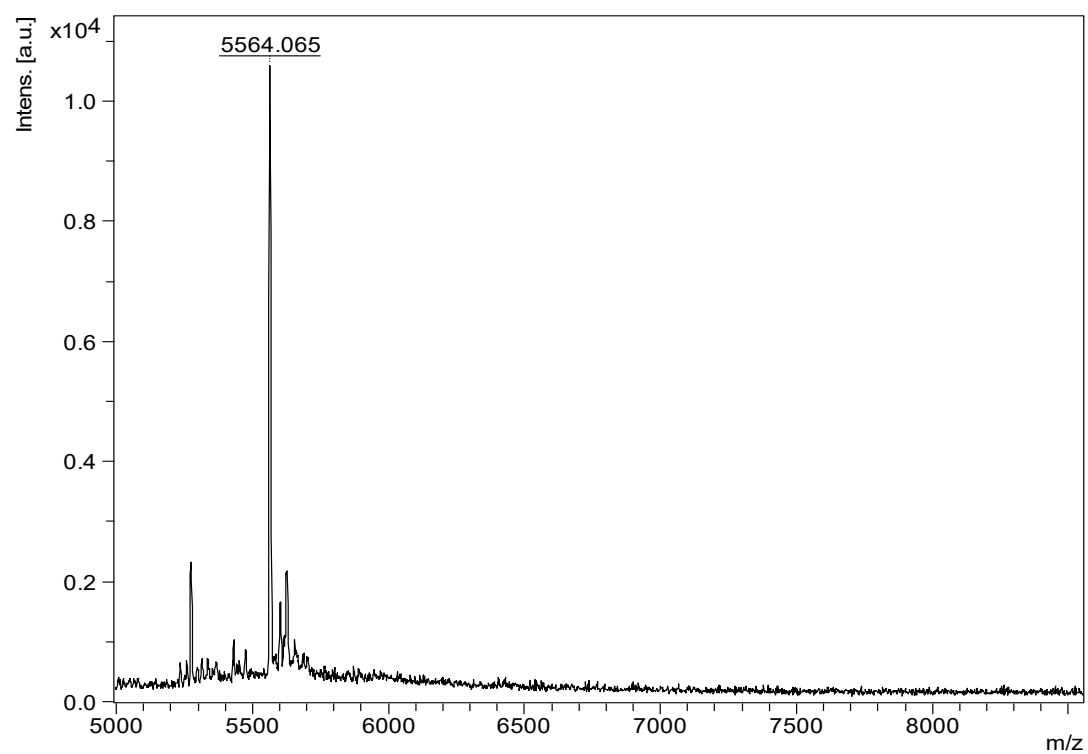

Supplement: s1 [file s1]
